# Supplementary material for: Estimation of Temperature and Associated Uncertainty from Fiber-Optic Raman-Spectrum Distributed Temperature Sensing
Source: MDPI journal article supplement (doi:10.3390/s20082235), 2020-04-15
Supplement: s1 [file s1]

# Article\_S1

February 17, 2020

```
[1]: import dask.array as da
import dtscalibration
import matplotlib.pyplot as plt
import numpy as np
import xarray as xr
```

```
/Users/bfdestombe/anaconda3/lib/python3.7/typing.py:845: FutureWarning: xarray
subclass DataStore should explicitly define __slots__
super().__init_subclass__(*args, **kwargs)
```

```
[2]: import sys; print('Python %s on %s' % (sys.version, sys.platform))
```

```
Python 3.7.5 (default, Oct 25 2019, 10:52:18)
[Clang 4.0.1 (tags/RELEASE_401/final)] on darwin
```

```
[3]: !pip show dtscalibration
```

```
Name: dtscalibration
Version: 0.8.0
Summary: A Python package to load raw DTS files, perform a calibration, and plot
the result
Home-page: https://github.com/dtscalibration/python-dts-calibration
Author: Bas des Tombe, Bart Schilperoort
Author-email: bdestombe@gmail.com
License: BSD 3-Clause License
Location: /Users/bfdestombe/Projects/dts-calibration/python-dts-calibration-
dev/src
Requires: numpy, xarray, pyyaml, xmltodict, scipy, patsy, statsmodels, nbsphinx,
dask, toolz, matplotlib, netCDF4, pandas, cloudpickle
Required-by:
```

```
[4]: !pip list
```

| Package   | Version | Location |
|-----------|---------|----------|
| alabaster | 0.7.12  |          |
| appdirs   | 1.4.3   |          |

|                                                                           |           |
|---------------------------------------------------------------------------|-----------|
| appnope                                                                   | 0.1.0     |
| attrs                                                                     | 19.1.0    |
| Babel                                                                     | 2.7.0     |
| backcall                                                                  | 0.1.0     |
| black                                                                     | 19.10b0   |
| bleach                                                                    | 3.1.0     |
| bokeh                                                                     | 1.3.4     |
| certifi                                                                   | 2019.9.11 |
| cftime                                                                    | 1.0.3.4   |
| chardet                                                                   | 3.0.4     |
| click                                                                     | 6.7       |
| cloudpickle                                                               | 1.2.2     |
| colorcet                                                                  | 2.0.1     |
| cycler                                                                    | 0.10.0    |
| dask                                                                      | 2.10.1    |
| datashader                                                                | 0.7.0     |
| datashape                                                                 | 0.5.2     |
| decorator                                                                 | 4.4.1     |
| defusedxml                                                                | 0.6.0     |
| distributed                                                               | 2.2.0     |
| docopt                                                                    | 0.6.2     |
| docutils                                                                  | 0.14      |
| dtscalibration                                                            | 0.8.0     |
| /Users/bfdestombe/Projects/dts-calibration/python-dts-calibration-dev/src |           |
| entrypoints                                                               | 0.3       |
| filelock                                                                  | 3.0.12    |
| HeapDict                                                                  | 1.0.0     |
| holoviews                                                                 | 1.12.1    |
| hvplot                                                                    | 0.4.0     |
| idna                                                                      | 2.8       |
| imageio                                                                   | 2.5.0     |
| imagesize                                                                 | 1.1.0     |
| importlib-metadata                                                        | 0.23      |
| ipython                                                                   | 7.9.0     |
| ipython-genutils                                                          | 0.2.0     |
| jedi                                                                      | 0.15.1    |
| Jinja2                                                                    | 2.10.1    |
| jsonschema                                                                | 3.0.1     |
| jupyter-core                                                              | 4.5.0     |
| kiwisolver                                                                | 1.1.0     |
| llvmlite                                                                  | 0.30.0    |
| locket                                                                    | 0.2.0     |
| Markdown                                                                  | 3.1.1     |
| MarkupSafe                                                                | 1.1.1     |
| matplotlib                                                                | 3.1.1     |
| mistune                                                                   | 0.8.4     |
| mkl-fft                                                                   | 1.0.14    |
| mkl-random                                                                | 1.1.0     |

|                  |                     |
|------------------|---------------------|
| mkl-service      | 2.3.0               |
| more-itertools   | 7.2.0               |
| mpmath           | 1.1.0               |
| msgpack          | 0.6.1               |
| multipledispatch | 0.6.0               |
| nbconvert        | 5.5.0               |
| nbformat         | 4.4.0               |
| nbsphinx         | 0.4.2               |
| netCDF4          | 1.5.1.2             |
| networkx         | 2.3                 |
| numba            | 0.46.0              |
| numpy            | 1.18.1              |
| packaging        | 19.0                |
| pandas           | 0.24.2              |
| pandocfilters    | 1.4.2               |
| panel            | 0.6.2               |
| param            | 1.9.1               |
| parso            | 0.5.1               |
| partd            | 1.0.0               |
| pathspect        | 0.7.0               |
| patsy            | 0.5.1               |
| pexpect          | 4.7.0               |
| pickleshare      | 0.7.5               |
| Pillow           | 6.1.0               |
| pip              | 19.3.1              |
| pluggy           | 0.13.0              |
| prompt-toolkit   | 2.0.10              |
| psutil           | 5.6.3               |
| ptyprocess       | 0.6.0               |
| py               | 1.8.0               |
| pyct             | 0.4.6               |
| Pygments         | 2.4.2               |
| pykwalify        | 1.7.0               |
| pyparsing        | 2.4.2               |
| PyQt5-sip        | 4.19.18             |
| pyrsistent       | 0.15.3              |
| python-dateutil  | 2.8.0               |
| pytz             | 2019.3              |
| pyviz-comms      | 0.7.2               |
| PyWavelets       | 1.0.3               |
| PyYAML           | 5.1.1               |
| regex            | 2020.1.8            |
| requests         | 2.22.0              |
| ruamel.yaml      | 0.15.100            |
| scikit-image     | 0.15.0              |
| scipy            | 1.3.0               |
| setuptools       | 41.6.0.post20191030 |
| six              | 1.12.0              |

|                               |        |
|-------------------------------|--------|
| snowballstemmer               | 1.9.0  |
| sortedcontainers              | 2.1.0  |
| Sphinx                        | 2.1.2  |
| sphinxcontrib-applehelp       | 1.0.1  |
| sphinxcontrib-devhelp         | 1.0.1  |
| sphinxcontrib-htmlhelp        | 1.0.2  |
| sphinxcontrib-jsmath          | 1.0.1  |
| sphinxcontrib-qthelp          | 1.0.2  |
| sphinxcontrib-serializinghtml | 1.1.3  |
| statsmodels                   | 0.10.0 |
| tblib                         | 1.4.0  |
| testpath                      | 0.3.1  |
| toml                          | 0.10.0 |
| toolz                         | 0.10.0 |
| tornado                       | 6.0.3  |
| tox                           | 3.14.0 |
| traitlets                     | 4.3.3  |
| typed-ast                     | 1.4.1  |
| urllib3                       | 1.25.3 |
| virtualenv                    | 16.7.7 |
| wcwidth                       | 0.1.7  |
| webencodings                  | 0.5.1  |
| wheel                         | 0.33.6 |
| xarray                        | 0.12.3 |
| xmltodict                     | 0.12.0 |
| xrviz                         | 0.1.1  |
| yapf                          | 0.28.0 |
| zict                          | 1.0.0  |
| zipp                          | 0.6.0  |

```
[5]: opendap_url = r"/Users/bfdestombe/Google Drive/PhD/research/DTS " \
      r"error/onedaynetcdf/calibrated1000x2sec.nc"
      # opendap_url = r"https://opendap.tudelft.nl/thredds/dodsC/data2/uuid/
      ↪71b5c3c2-4105-4f4f-bd1e-d7c56732a665/calibrated1000x2sec.nc"
```

```
[6]: sections = {
      'probe1Temperature': [slice(7.5, 17.), slice(70., 80.)], # cold bath
      'probe2Temperature': [slice(24., 34.), slice(85., 95.)], # warm bath
      'external_probe_dts': [slice(39., 48.)]
    }
    calibration_sections = {
      'probe1Temperature': [slice(7.5, 17.)], # cold bath
      'probe2Temperature': [slice(24., 34.)], # warm bath
    }
    valid_measurement_range = slice(0.0, 97.0) # only consider parts of the fiber
```

```
[7]: ds = dtscalibration.open_datastore(opendap_url, load_in_memory=True)

ds = ds.sel(x=valid_measurement_range).isel(
    x=slice(None, None, 2)) # Only use every other measurement, to minimize
    ↪ spatial correlation
```

## 1 Perform the calibration

```
[8]: ds.sections = calibration_sections
```

```
[9]: st_var, st_resid = ds.variance_stokes(st_label='ST')
ast_var, ast_resid = ds.variance_stokes(st_label='AST')
rst_var, rst_resid = ds.variance_stokes(st_label='REV-ST')
rast_var, rast_resid = ds.variance_stokes(st_label='REV-AST')
```

```
[10]: nmc = 100 # Increase to 10000, but computation time increases quickly.
ds.calibration_double_ended(
    st_var=st_var,
    ast_var=ast_var,
    rst_var=rst_var,
    rast_var=rast_var,
    store_tmpw='TMPW',
    method='wls',
    solver='sparse',
    tmpw_mc_size=nmc)
ds = ds.compute() # Easily fits in everyone's computer memory. To speed up
    ↪ computation.
```

```
[11]: # For the statistics use all sections
ds.sections = sections

ds.conf_int_double_ended(
    st_var=st_var,
    ast_var=ast_var,
    rst_var=rst_var,
    rast_var=rast_var,
    conf_ints=[2.5, 97.5],
    ci_avg_time_flag=False,
    ci_avg_x_flag=True,
    store_tempvar='_var_x',
    remove_mc_set_flag=True,
    mc_sample_size=nmc, # <- choose a much larger sample size)
    var_only_sections=True)
```

```
[12]: ds['TMPW'] = ds['TMPW'].compute() # We need this one for many calculations
```

```

# For the statistics use all sections
ds.sections = sections

# Construct full array with measurements from external temperature sensor
# by broadcasting the reference temperatures.
tmp_ref_arr = ds.ufunc_per_section(
    label='ST',
    ref_temp_broadcasted=True,
    calc_per='all')
ix_resid = ds.ufunc_per_section(
    x_indices=True,
    calc_per='all')
tmp_ref_sorted = np.full(
    shape=ds.ST.shape, fill_value=np.nan)
tmp_ref_sorted[ix_resid, :] = tmp_ref_arr
tmp_ref_da = xr.DataArray(
    data=tmp_ref_sorted,
    coords=ds.ST.coords)

```

```

[13]: q = ds['TMPW'] - tmp_ref_da.values

ds['TMPW_mean_unc_time'] = q.mean(dim='hours').compute()
ds['TMPW_mean_unc_x'] = q.mean(dim='x').compute()

ds['TMPW_std_unc_time'] = q.std(dim='hours').compute()
ds['TMPW_std_unc_x'] = q.std(dim='x').compute()

```

```

/Users/bfdestombe/anaconda3/lib/python3.7/site-
packages/xarray/core/nanops.py:140: RuntimeWarning: Mean of empty slice
    return np.nanmean(a, axis=axis, dtype=dtype)

```

```

[14]: ds.conf_int_double_ended(
    st_var=st_var,
    ast_var=ast_var,
    rst_var=rst_var,
    rast_var=rast_var,
    conf_ints=[2.5, 97.5],
    ci_avg_time_flag=False,
    ci_avg_x_flag=False,
    mc_sample_size=nmc) # <- choose a much larger sample size)

```

```

[15]: # ds.to_netcdf(r"paper_sensors.nc", encoding={})

```

## 2 Table 2

```
[16]: print('The values may differ, depending on the number of Monte Carlo samples_
      ↪used (nmc).')

# ds['in_ci'] contains a boolean array whether the reference temperatures fall_
      ↪within the confidence intervals
ds['in_ci'] = ds.in_confidence_interval('TMPW_MC', [2.5, 97.5])

f = lambda x: np.sum(x) / np.size(x) * 100
poster_table = da.compute(
    ds.ufunc_per_section(label='in_ci', func=f, calc_per='stretch'))
print('Per reference section: \n\t', poster_table)
poster_table = da.compute(
    ds.ufunc_per_section(label='in_ci', func=f, calc_per='all'))
print('\n\nFor all reference section: \n\t', poster_table)
```

The values may differ, depending on the number of Monte Carlo samples used (nmc).

/Users/bfdestombe/anaconda3/lib/python3.7/site-packages/dask/array/core.py:1328:  
FutureWarning: The `numpy.size` function is not implemented by Dask array. You may want to use the `da.map_blocks` function or something similar to silence this warning. Your code may stop working in a future release.

FutureWarning,  
/Users/bfdestombe/anaconda3/lib/python3.7/site-packages/dask/core.py:119:  
RuntimeWarning: invalid value encountered in less\_equal

return func(\*args2)  
/Users/bfdestombe/anaconda3/lib/python3.7/site-packages/dask/core.py:119:  
RuntimeWarning: invalid value encountered in greater\_equal

return func(\*args2)  
/Users/bfdestombe/anaconda3/lib/python3.7/site-packages/dask/array/core.py:1328:  
FutureWarning: The `numpy.size` function is not implemented by Dask array. You may want to use the `da.map_blocks` function or something similar to silence this warning. Your code may stop working in a future release.

FutureWarning,  
/Users/bfdestombe/anaconda3/lib/python3.7/site-packages/dask/core.py:119:  
RuntimeWarning: invalid value encountered in less\_equal

return func(\*args2)  
/Users/bfdestombe/anaconda3/lib/python3.7/site-packages/dask/core.py:119:  
RuntimeWarning: invalid value encountered in greater\_equal

return func(\*args2)  
/Users/bfdestombe/anaconda3/lib/python3.7/site-packages/dask/array/core.py:1328:  
FutureWarning: The `numpy.size` function is not implemented by Dask array. You may want to use the `da.map_blocks` function or something similar to silence this warning. Your code may stop working in a future release.

FutureWarning,  
/Users/bfdestombe/anaconda3/lib/python3.7/site-packages/dask/core.py:119:

```

RuntimeWarning: invalid value encountered in less_equal
    return func(*args2)
/Users/bfdestombe/anaconda3/lib/python3.7/site-packages/dask/core.py:119:
RuntimeWarning: invalid value encountered in greater_equal
    return func(*args2)
/Users/bfdestombe/anaconda3/lib/python3.7/site-packages/dask/array/core.py:1328:
FutureWarning: The `numpy.size` function is not implemented by Dask array. You
may want to use the da.map_blocks function or something similar to silence this
warning. Your code may stop working in a future release.
    FutureWarning,
/Users/bfdestombe/anaconda3/lib/python3.7/site-packages/dask/core.py:119:
RuntimeWarning: invalid value encountered in less_equal
    return func(*args2)
/Users/bfdestombe/anaconda3/lib/python3.7/site-packages/dask/core.py:119:
RuntimeWarning: invalid value encountered in greater_equal
    return func(*args2)
/Users/bfdestombe/anaconda3/lib/python3.7/site-packages/dask/array/core.py:1328:
FutureWarning: The `numpy.size` function is not implemented by Dask array. You
may want to use the da.map_blocks function or something similar to silence this
warning. Your code may stop working in a future release.
    FutureWarning,
/Users/bfdestombe/anaconda3/lib/python3.7/site-packages/dask/core.py:119:
RuntimeWarning: invalid value encountered in less_equal
    return func(*args2)
/Users/bfdestombe/anaconda3/lib/python3.7/site-packages/dask/core.py:119:
RuntimeWarning: invalid value encountered in greater_equal
    return func(*args2)
/Users/bfdestombe/anaconda3/lib/python3.7/site-packages/dask/core.py:119:
RuntimeWarning: invalid value encountered in less_equal
    return func(*args2)
/Users/bfdestombe/anaconda3/lib/python3.7/site-packages/dask/core.py:119:
RuntimeWarning: invalid value encountered in greater_equal
    return func(*args2)

Per reference section:
    ({'external_probe_dts': [90.03714285714285], 'probe1Temperature':
[93.54864864864865, 92.67179487179487], 'probe2Temperature': [92.92564102564103,
92.03846153846153]},)

/Users/bfdestombe/anaconda3/lib/python3.7/site-packages/dask/array/core.py:1328:
FutureWarning: The `numpy.size` function is not implemented by Dask array. You
may want to use the da.map_blocks function or something similar to silence this
warning. Your code may stop working in a future release.
    FutureWarning,
/Users/bfdestombe/anaconda3/lib/python3.7/site-packages/dask/core.py:119:
RuntimeWarning: invalid value encountered in less_equal
    return func(*args2)
/Users/bfdestombe/anaconda3/lib/python3.7/site-packages/dask/core.py:119:
RuntimeWarning: invalid value encountered in greater_equal

```



```

    return func(*args2)
/Users/bfdestombe/anaconda3/lib/python3.7/site-packages/dask/core.py:119:
RuntimeWarning: invalid value encountered in less_equal
    return func(*args2)
/Users/bfdestombe/anaconda3/lib/python3.7/site-packages/dask/core.py:119:
RuntimeWarning: invalid value encountered in greater_equal
    return func(*args2)

```

For all reference section:  
 (92.27724867724868,)

### 3 Figure 3. Confidence interval of the temperature at the first time step.

```

[18]: print('The plots may slightly differ, depending on the number of Monte Carlo_
    ↪samples used (nmc).\n' +
    'Increasing the Monte Carlo sample size smoothens the edges of the confidence_
    ↪interval.')

ds.sections = sections

sections_names = {
    'Cold 1': [slice(7.5, 17.)],
    'Warm 1': [slice(24., 34.)],
    'Ambient': [slice(40., 50.)],
    'Cold 2': [slice(70., 80.)],
    'Warm 2': [slice(85., 95.)]
}
sections_names2 = {
    'Cold 1': 'Used for calibration',
    'Warm 1': 'Used for calibration',
    'Ambient': '',
    'Cold 2': '',
    'Warm 2': ''
}

# Construct figure
it = 0
fig, axs = plt.subplots(2, 1, figsize=(10, 7), sharex=True,
                        gridspec_kw=dict(hspace=0.05, wspace=0.))

title = 'Estimated temperature and 95% confidence interval at time step 1'
fig.suptitle(title, y=0.91)

# subfig a

```

```

ax = axs[0]

dn = ds.TMPW_MC.isel(CI=0, hours=it).values
up = ds.TMPW_MC.isel(CI=1, hours=it).values
val = ds.TMPW.isel(hours=it).values
x = ds.x.values
ax.fill_between(x, dn, up, facecolor='C0', label='95% Confidence Interval',
                alpha=0.3)
ax.plot(x, val, linewidth=0.9, c='black', label='Estimated temperature')

ax.set_ylabel('temperature ($^\circ$C)')
ax.set_ylim([1.9, 20])
ax.legend(loc='upper left')

ylim_bot = 3.

for k, v in sections_names.items():
    for vi in v:
        ax.plot([vi.start, vi.stop], [ylim_bot, ylim_bot],
                linewidth=0.8,
                c='black')
        tbx, tby = (vi.start + vi.stop) / 2, ylim_bot
        ax.annotate(k,
                    xy=(tbx, tby),
                    ha='center',
                    va='bottom',
                    fontsize=8,
                    xytext=(0, 2),
                    textcoords='offset points') # ,

sections_names2 = {
    'Cold 1': 'Used for calibration',
    'Warm 1': 'Used for calibration',
    'Ambient': '',
    'Cold 2': '',
    'Warm 2': ''
}

for (k, v), (k2, v2) in zip(sections_names.items(), sections_names2.items()):
    for vi in v:
        tbx, tby = (vi.start + vi.stop) / 2, ylim_bot
        ax.annotate(v2,
                    xy=(tbx, tby),
                    ha='center',
                    va='top',
                    fontsize=8,
                    xytext=(0, -2),

```

```

        textcoords='offset points')
# plt.show()

ds2 = dtscalibration.open_datastore(opendap_url,
                                    chunks={})
ds2.sections = {
    'probe1Temperature': [slice(7.5, 17.), slice(70., 80.)], # cold bath
    'probe2Temperature': [slice(24., 34.), slice(85., 95.)], # warm bath
    'external_probe_dts': [slice(39., 48.)]
}
ds2['in_ci'] = ds2.in_confidence_interval('TMPW_MC', [2.5, 97.5])

poster_table = da.compute(
    ds2.ufunc_per_section(label='in_ci', func=np.sum, calc_per='stretch'))
print(poster_table)

# subfig b
ax = axs[1]
x = ds.x.values

ds_sel = ds.isel(hours=it)

tmpw = ds_sel.TMPW

tmp_ref_arr = ds.ufunc_per_section(label='ST',
                                   ref_temp_broadcasted=True,
                                   calc_per='all')
ix_resid = ds.ufunc_per_section(x_indices=True, calc_per='all')

tmp_ref_sorted = np.full(shape=ds.ST.shape, fill_value=np.nan)
tmp_ref_sorted[ix_resid, :] = tmp_ref_arr
tmp_ref_da = xr.DataArray(data=tmp_ref_sorted, coords=ds.ST.coords)
tmp_ref = tmp_ref_da.isel(hours=it)

meas = (tmpw - tmp_ref).values
up = (tmpw - ds_sel.TMPW_MC.isel(CI=0)).values
dn = (tmpw - ds_sel.TMPW_MC.isel(CI=1)).values

ax.fill_between(x, dn, up, label='95% Confidence Interval', alpha=0.3,
               facecolor='C0')
ax.axhline(0., c='black', linewidth=0.9)
out_mask = np.logical_or(meas >= up, meas <= dn)
in_mask = np.logical_or(meas < up, meas > dn)
ax.scatter(x[in_mask],
           meas[in_mask],
           marker='.',
           c='black',

```

```

        label='Inside confidence interval')
ax.scatter(x[out_mask],
           meas[out_mask],
           marker='*',
           c='red',
           label='Outside confidence interval')

ax.legend(loc='upper left')
ax.set_ylim([-0.5, 0.5])

ylim_bot = ax.get_ylim()[0] + 0.06 * (ax.get_ylim()[1] - ax.get_ylim()[0])

for k, v in sections_names.items():
    for vi in v:
        ax.plot([vi.start, vi.stop], [ylim_bot, ylim_bot],
                linewidth=0.8,
                c='black')
        tbx, tby = (vi.start + vi.stop) / 2, ylim_bot
        ax.annotate(k,
                    xy=(tbx, tby),
                    ha='center',
                    va='bottom',
                    fontsize=8,
                    xytext=(0, 2),
                    textcoords='offset points') # ,
        # bbox=dict(fc='white', alpha=0.4, color='none'))

for (k, v), (k2, v2) in zip(sections_names.items(), sections_names2.items()):
    for vi in v:
        tbx, tby = (vi.start + vi.stop) / 2, ylim_bot
        ax.annotate(v2,
                    xy=(tbx, tby),
                    ha='center',
                    va='top',
                    fontsize=8,
                    xytext=(0, -2),
                    textcoords='offset points')

ax.set_xlabel('$x$ (m)')
ax.set_ylabel('$T$ - $T_{\text{reference}}$ ($^\circ\text{C}$)')
# fig.tight_layout()
fig.text(0.05, 0.86, 'a)', fontsize=14)
fig.text(0.05, 0.46, 'b)', fontsize=14)
plt.show()

```

The plots may slightly differ, depending on the number of Monte Carlo samples used (nmc).

Increasing the Monte Carlo sample size smoothens the edges of the confidence interval.

```
/Users/bfdestombe/anaconda3/lib/python3.7/site-packages/dask/core.py:119:
```

```
RuntimeWarning: invalid value encountered in less_equal
```

```
    return func(*args2)
```

```
/Users/bfdestombe/anaconda3/lib/python3.7/site-packages/dask/core.py:119:
```

```
RuntimeWarning: invalid value encountered in greater_equal
```

```
    return func(*args2)
```

```
({'external_probe_dts': [66519], 'probe1Temperature': [71538, 74090],  
'probe2Temperature': [73639, 73029]},)
```

```
/Users/bfdestombe/anaconda3/lib/python3.7/site-
```

```
packages/ipykernel_launcher.py:118: RuntimeWarning: invalid value encountered in  
greater_equal
```

```
/Users/bfdestombe/anaconda3/lib/python3.7/site-
```

```
packages/ipykernel_launcher.py:118: RuntimeWarning: invalid value encountered in  
less_equal
```

```
/Users/bfdestombe/anaconda3/lib/python3.7/site-
```

```
packages/ipykernel_launcher.py:119: RuntimeWarning: invalid value encountered in  
less
```

```
/Users/bfdestombe/anaconda3/lib/python3.7/site-
```

```
packages/ipykernel_launcher.py:119: RuntimeWarning: invalid value encountered in  
greater
```

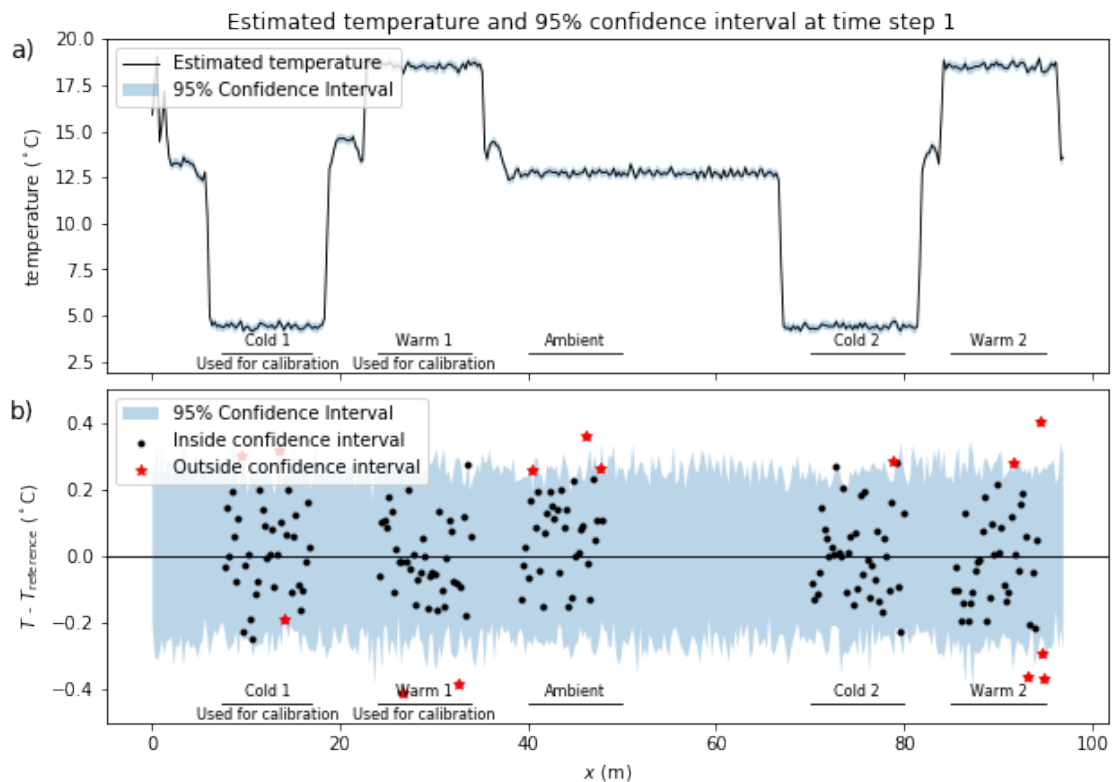

#### 4 Figure 4. Spatial variation of the uncertainty.

```
[19]: # spatial variation
fig, ax = plt.subplots(figsize=(10, 3))
ax.axhline(0., linewidth=0.8, c='black')
ax.axhspan(None, None, label='Standard uncertainty', facecolor='C0')
ax.axhspan(None, None, label='Mean difference', facecolor='C1')

# std
y_est = (ds.TMPW_MC_var_time**0.5).values
x_est = (ds.TMPW_MC_var_time**0.5).x.values
ax.plot(x_est, y_est, linewidth=3.5, c='white',
        alpha=0.5)
ax.plot(x_est, y_est, linewidth=2., c='white')
ax.plot(x_est, y_est, linewidth=0.8, c='black')
# ax.plot(x_est, y_est, linewidth=0.8, c='black', dashes=[7.5, 5])

y_err = ds.TMPW_std_unc_time.values
x_err = ds.TMPW_std_unc_time.x.values
ax.scatter(x_err, y_err, marker='x', s=9)

y_err = ds.TMPW_mean_unc_time.values
x_err = ds.TMPW_mean_unc_time.x.values

ax.scatter(x_err, y_err, marker='.')

# labels
sections_names = {
    'Cold 1': [slice(7.5, 17.)],
    'Warm 1': [slice(24., 34.)],
    'Ambient': [slice(40., 50.)],
    'Cold 2': [slice(70., 80.)],
    'Warm 2': [slice(85., 95.)]
}
sections_names2 = {
    'Cold 1': 'Used for calibration',
    'Warm 1': 'Used for calibration',
    'Ambient': '',
    'Cold 2': '',
    'Warm 2': ''
}
ylim_bot = -0.05
for k, v in sections_names.items():
    for vi in v:
        ax.plot([vi.start, vi.stop], [ylim_bot, ylim_bot],
```

```

        linewidth=0.8,
        c='black')
    tbx, tby = (vi.start + vi.stop) / 2, ylim_bot
    ax.annotate(k,
                xy=(tbx, tby),
                ha='center',
                va='bottom',
                fontsize=8,
                xytext=(0, 2),
                textcoords='offset points') # ,
for (k, v), (k2, v2) in zip(sections_names.items(), sections_names2.items()):
    for vi in v:
        tbx, tby = (vi.start + vi.stop) / 2, ylim_bot
        ax.annotate(v2,
                    xy=(tbx, tby),
                    ha='center',
                    va='top',
                    fontsize=8,
                    xytext=(0, -2),
                    textcoords='offset points')

h_std_unc1 = ax.plot([], [], linewidth=4, c='black')
h_std = ax.scatter([], [], marker='x', s=18, color='C0')
h_avg = ax.scatter([], [], marker='.', s=80, color='C1')
ax.legend([h_std_unc1[0], h_std, h_avg],
          ['Standard uncertainty', 'Standard deviation of differences',
           'Mean of differences'],
          loc='center right', fontsize='small')
ax.set_xlabel('x (m)')
ax.set_ylabel('temperature ( $^{\circ}\text{C}$ )')
ax.set_ylim((-0.07, 0.16))
# fig.tight_layout()
fig.subplots_adjust(bottom=0.15)

print('The plots may slightly differ, depending on the number of Monte Carlo_
      ↪samples used (nmc)')

```

The plots may slightly differ, depending on the number of Monte Carlo samples used (nmc)

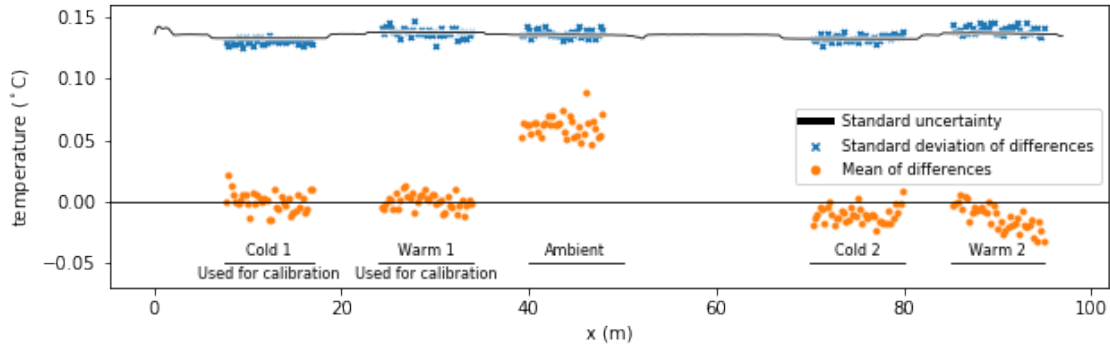

5 Figure 5. Temporal variation of the uncertainty.

```
[20]: fig, ax = plt.subplots(figsize=(10, 3))
ax.axhline(0., linewidth=0.8, c='black')

# std
y_est = (ds.TMPW_MC_var_x**0.5).values
x_est = (ds.TMPW_MC_var_x**0.5).hours.values
ax.plot(x_est, y_est, linewidth=3.5, c='white', alpha=0.5)
ax.plot(x_est, y_est, linewidth=2., c='white')
ax.plot(x_est, y_est, linewidth=0.8, c='black')

y_err = ds.TMPW_std_unc_x.values
x_err = ds.TMPW_std_unc_x.hours.values
ax.scatter(x_err, y_err, marker='x', s=9, color='C0')

y_err = ds.TMPW_mean_unc_x.values
x_err = ds.TMPW_mean_unc_x.hours.values

ax.scatter(x_err, y_err, marker='.', color='C1')

ax.set_ylabel('temperature ($^\circ\text{C}$)')
ax.set_ylim((-0.05, 0.17))
ax.set_xlabel('time (hours)')

# legend
h_std_unc1 = ax.plot([], [], linewidth=4, c='black')
h_std = ax.scatter([], [], marker='x', s=18, color='C0')
h_avg = ax.scatter([], [], marker='.', s=80, color='C1')
ax.legend([h_std_unc1[0], h_std, h_avg],
          ['Standard uncertainty', 'Standard deviation of differences',
           'Mean of differences'],
```



```
loc='center right', fontsize='small')  
  
# fig.tight_layout()  
fig.subplots_adjust(bottom=0.15)
```

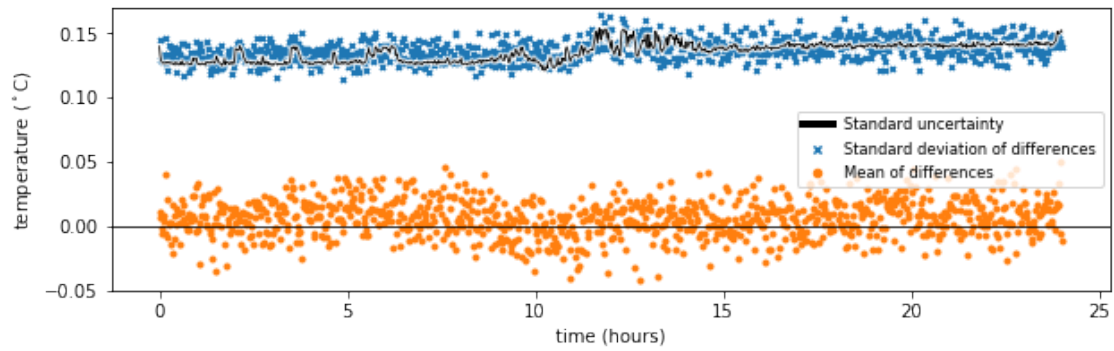

```
[ ]:
```
